1 **Using remotely delivered Spring Forest Qigong™ to reduce neuropathic pain in**  
2 **adults with spinal cord injury: Protocol of a quasi-experimental clinical trial**

3 Ann Van de Winckel, PhD, MSPT, PT<sup>1</sup>; Sydney Carpentier, BA<sup>2</sup>; Wei Deng, BS<sup>2</sup>; Lin  
4 Zhang, PhD<sup>3</sup>; Ricardo Battaglino, PhD<sup>4</sup>; Leslie Morse, DO<sup>4</sup>

5  
6 <sup>1</sup> Division of Physical Therapy, Division of Rehabilitation Science, Department of  
7 Rehabilitation Medicine, Medical School, University of Minnesota, USA

8 <sup>2</sup> Division of Rehabilitation Science, Department of Rehabilitation Medicine, Medical  
9 School, University of Minnesota, USA

10 <sup>3</sup> Division of Biostatistics, School of Public Health, University of Minnesota, USA

11 <sup>4</sup> Department of Rehabilitation Medicine, Medical School, University of Minnesota, USA

12

13 **WORD COUNT: 3995**

14

15 **ORCID ID:**

16 Ann Van de Winckel: 0000-0001-8400-3177

17 Sydney Carpentier: 0000-0003-2398-085X

18 Wei Deng: 0000-0002-7933-389X

19 Lin Zhang: 0000-0002-0003-6084

20 Ricardo Battaglino: 0000-0002-0272-1763

21 Leslie Morse: 0000-0002-7426-6341

22

23 **CORRESPONDING AUTHOR:**

24 Dr. Ann Van de Winckel, PhD, MSPT, PT

25 Division of Physical Therapy, Division of Rehabilitation Science, Department of

26 Rehabilitation Medicine, Medical School, University of Minnesota, 420 Delaware St SE

27 (MMC 388), Rm 311, Minneapolis, MN 55455; Phone: 612-625-1191; Fax: 612-625-

28 4274; E-mail: [avandewi@umn.edu](mailto:avandewi@umn.edu)

29 **Abstract**

30 ***Introduction***

31 About 50% of Americans living with spinal cord injury (SCI) suffer from long-term  
32 debilitating neuropathic pain, interfering with the quality of daily life. Neuropathic pain is  
33 refractory to many available treatments –some carrying a risk for opioid addiction–  
34 highlighting an urgent need for new treatments. In this study, we will test our hypothesis  
35 that Spring Forest Qigong will reduce SCI-related neuropathic pain by improving body  
36 awareness. We will determine whether remotely delivered Qigong is feasible and  
37 whether it reduces neuropathic pain (primary outcome). We will also determine whether  
38 it reduces spasms frequency and/or severity, and improves functional performance,  
39 mood, or body awareness (secondary outcomes).

40 ***Methods and analysis***

41 In this quasi-experimental pilot clinical trial study, adults with SCI will practice Qigong at  
42 home with a 45min video, at least 3x/week for 12 weeks. The Qigong practice includes  
43 movements with guided breathing and is individualized based on functional abilities, i.e.,  
44 the participants will do kinesthetic imagery of Qigong movements with guided breathing,  
45 for movements that they are unable to perform actively. The primary clinical outcome  
46 –the highest, average, and lowest neuropathic pain ratings perceived in the prior week–  
47 will be recorded weekly throughout the study period. The secondary outcomes will be  
48 collected at 4 time points: at baseline, midway during the Qigong intervention (6 weeks),  
49 after the Qigong intervention (12 weeks), and after the 6-week follow-up. The data will  
50 be analyzed with a repeated measure ANOVA and with Tukey post-hoc tests.

51 ***Ethics and dissemination***

52 The University of Minnesota (UMN)'s Institutional Review Board (IRB) approved the  
53 study (IRB #STUDY00011997). All participants will sign electronic informed consent on  
54 the secure UMN REDCap platform. The results will be presented at academic  
55 conferences and published in peer-reviewed publications.

56 **ClinicalTrial.gov registration number:** NCT04917107.

57

58 **Keywords:** spinal cord injury; neurological pain; spasms; function; Qigong; body  
59 awareness

60

61

## 62 **ARTICLE SUMMARY**

### 63 **Strengths and limitations of this study**

- 64 ● This is the first pilot clinical trial study using Remotely delivered Qigong for  
65 neuropathic pain relief in adults with SCI. Data are collected before, and after the  
66 intervention as well as after a 6-week follow-up period.
- 67 ● This study will provide evidence on the feasibility of remotely delivered Qigong and  
68 whether Qigong practice reduces neuropathic pain, and as secondary outcomes,  
69 reduces spasms, improves functional performance, mood, or body awareness.
- 70 ● Adults with SCI-related neuropathic pain were involved in the design of this study.
- 71 ● We did not include a sham version of Qigong and, because there is no group  
72 allocation, the assessor, participant, or analyst are not blinded.
- 73 ● Because of the relatively small sample size in this study, validation of positive results  
74 will need to be validated in a larger sample size, include a control group, and provide  
75 a longer follow-up period to address the longer-term duration of the effects.

## 76 INTRODUCTION

77 About 50% of the 294,000 Americans living with spinal cord injury (SCI) suffer from  
78 debilitating neuropathic pain, interfering with general activity, mobility, mood, sleep, and  
79 quality of life.[1–3] Yet, neuropathic pain is refractory to many treatments, and some  
80 medications carry a risk for opioid addiction, highlighting a need for new treatments.[4]

81       Neuropathic pain in adults with SCI has been attributed to altered pain  
82 processing-related brain function.[5–7] Due to this alteration, there is a disconnect  
83 between the sensory information that the brain is expecting to receive and the  
84 interpretation of the missing or incorrect sensory information that the brain actually  
85 receives. The brain uses a prediction framework in which predictions of sensory input  
86 are compared to actual sensory input. In adults with SCI, the disruption of sensory  
87 inflow is compensated for by upregulating the residual sensory inflow (or, in the case of  
88 complete injury, spontaneous noise fluctuations). In addition to an increase in sensory  
89 signals, attention and body awareness serve as a sophisticated integrative mechanism  
90 that typically adapts well to changes in peripheral signals. However, in adults with SCI,  
91 these adaptations can “get stuck” such that the sensory signal is not spontaneously re-  
92 calibrated but might give rise to chronic phantom-like percepts. This disconnect leads to  
93 altered brain circuitry related to sensory information.[5,6,8,9] Because sensory  
94 information includes increased pain sensation, the disconnect, in turn, drives the  
95 neuropathic pain perception.[5,6,8,9] Concurrently, recent studies showed that SCI-  
96 related brain alterations impact body awareness in addition to pain perception.[10–13]

97 Mind and body approaches –known for training body awareness– have been shown  
98 to reduce pain in populations with chronic low back pain and fibromyalgia, but evidence  
99 of its effectiveness in adults with SCI is limited.[14–22] Adaptive Yoga vs. waitlist group  
100 decreased depression and improved self-compassion, but not pain in adults with SCI.  
101 [21] A seated Tai Chi program (single-arm study) was well-tolerated in adults with SCI,  
102 reduced pain, and improved emotional and physical well-being immediately after each  
103 session.[22] However, the weekly in-person classes were associated with a 60% drop-  
104 out, and only included adults with paraplegia were included. While these are promising  
105 results, more studies are needed.

106 Qigong –a mind and body approach that incorporates gentle body movements,  
107 paired with a focus on breathing and body awareness to promote health and wellness–  
108 is accessible for adults with SCI due to the simple, gentle movements, which can be  
109 done in a sitting or lying position or by doing kinesthetic imagery of the movements  
110 when active movements are not possible.[17,23] Practicing Qigong has been  
111 recognized to improve posture, body awareness, and emotional balance.[17] Some  
112 Qigong programs are available online, which helps make the practice accessible for  
113 adults with SCI with transportation issues or who live too far away from Qigong centers.

114 In this quasi-experimental study, we will test our hypothesis that the remotely  
115 delivered Qigong will reduce SCI-related neuropathic pain by improving body  
116 awareness. If our hypothesis is validated, the outcome of our work will be the first step  
117 in demonstrating a potentially effective therapy for adults with SCI-related neuropathic  
118 pain. To test this hypothesis, we will determine whether 12 weeks of remote Qigong is

119 feasible and well-tolerated and whether it reduces neuropathic pain in adults with SCI.  
120 Given the reported associations with pain, we will assess whether Qigong practice  
121 reduces spasms frequency and/or severity, and improves function, mood, and body  
122 awareness as secondary outcomes.

123

## 124 **METHODS AND ANALYSIS**

125

### 126 **Study design**

127 The study flow chart of this quasi-experimental pre-post design is presented in **Figure**

128 **1.** Participants with SCI-related neuropathic pain and with complete or incomplete

129 paraplegia or tetraplegia will perform 12 weeks of “Five Element Qigong Healing

130 Movements of Spring Forest Qigong” with an online video at home, at least 3x/week, 41

131 min/session. *Individual weekly check-ins* (15-30min) are organized during the Qigong

132 practice to address questions and demonstrate movements over Zoom if needed.

133 Qualitative information will be collected about their adherence, adverse outcomes if any,

134 perceptions, effects, and satisfaction with the Qigong practice. During the whole study

135 period, we will record weekly the highest, average, and lowest neuropathic pain

136 intensity ratings perceived in the prior week (primary outcome), the dose of neuropathic

137 pain medication, recent illnesses, health care utilization, and/or recent hospitalizations,

138 and any activity that would indicate community integration.

139 The secondary outcomes will be collected at 4 time points: at baseline, midway during

140 the Qigong intervention (6 weeks), after the Qigong intervention (12 weeks), and after



141 the 6-week follow-up. During the 6-week follow-up, participants will not practice Qigong  
142 but receive regular standard of care as needed.  
143 Participants will receive \$100 upon study completion, through a Greenphire ClinCard.  
144 The Qigong introduction class and video access will be paid for by the study.  
145 Participants will be encouraged to complete all scheduled virtual visits and  
146 assessments. Given that this study is conducted during the COVID-19 pandemic, we  
147 estimate 90% adherence and 30% attrition given a high likelihood of some participants  
148 being exposed to COVID-19 during the study. If an assessment or weekly check-in is  
149 missed, care will be taken to get the information at a later time. There are no stop  
150 criteria for missed sessions or testing. The study team will decide when to consider a  
151 participant “lost to follow-up” based on clinical/scientific judgment on a case-by-case  
152 basis. Missed testing sessions will be recorded for consideration during the analysis but  
153 will not be cause for removal from the study.

154

## 155 **Participants**

156 From July 1, 2021, until July 1, 2023, we plan on recruiting 23 adults with SCI-related  
157 neuropathic pain, who are 18–75 years old, with SCI of  $\geq 3$  months, medically stable with  
158 complete or incomplete paraplegia (T1 and below) or tetraplegia (C4 and below), and  
159 with the highest level of SCI-related neuropathic pain  $\geq 3$  on the Numeric Pain Rating  
160 Scale.[24]

161 We estimate the average age of participants to be 43 years old.[25], and the sex  
162 ration to be 4:1 (men:women).[4,25] About 24% of SCI occur among non-Hispanic  
163 Blacks.[4,25] Given the small sample size, and the fact that Minnesota has a 79.10%  
164 non-Hispanic white population and 7.00% non-Hispanic Blacks,[26] we may not be able  
165 to investigate the effects of sex or race. The exclusion criteria are uncontrolled seizure  
166 disorder; cognitive or communicative impairments that prevent participants from  
167 following directions or learning; ventilator dependency; other major medical  
168 complications; treatments for neuropathic pain other than medication.

169

#### 170 **Patient and public involvement**

171 Adults with SCI-related neuropathic pain living in the community were invited to share  
172 their perception of 'priority research' (in this case, treatments for neuropathic pain that  
173 are not pharmaceutical or invasive), relevant outcomes (listed in this study),  
174 assessment, and study duration. They preferred remote interventions because many  
175 adults with SCI have transportation issues and some live rurally or out of state.

176

#### 177 **Sample size calculation**

178 To our knowledge, this will be the first study evaluating the feasibility and effects of  
179 Qigong on neuropathic pain perception. This study will provide preliminary estimates of  
180 effect size, crucial to generate hypotheses for future larger randomized controlled trials.  
181 We conducted a preliminary power calculation for the given sample size based on  
182 estimates from another body awareness therapy in adults with SCI (currently

183 unpublished). In this prior study, we saw a reduction in neuropathic pain intensity of *at*  
184 *least*  $2.31 \pm 2.07$  points for the highest, average, and lowest neuropathic pain in the prior  
185 week. Assuming the same standard deviation estimate, a total of 23 participants will  
186 have 99% power to detect the same pain reduction of 2.31 points on the numeric pain  
187 rating scale (standardized Cohen's  $d = 1.11$ ) with a two-sided significance level of 0.05  
188 using a paired *t*-test, and 80% power to detect a pain reduction of 1.45 points (Cohen's  
189  $d=0.7$ ) in this study. With an attrition rate of 30%, the planned sample size will still have  
190 80% power to detect a pain reduction of 1.57 points (Cohen's  $d=0.76$ ).

191

## 192 **Participant recruitment, sampling design, eConsenting**

193 Participants will be recruited in outpatient locations within the newly funded Spinal Cord  
194 Injury Model System Center (Minnesota Regional Spinal Cord Injury Model System) and  
195 the community. Specifically, we have collaborators within the Minneapolis VA Health  
196 Care System including the Minnesota Paralyzed Veterans; University of Minnesota  
197 Medical Center, M Health Fairview (Minneapolis); MN SCI associations; Regions  
198 Hospital; Courage Kenny Rehabilitation Institute; Get Up Stand Up To Cure Paralysis;  
199 Unite2fight paralysis, and Fit4Recovery.

200 We will use volunteer sampling through fliers, and post study-relevant information on  
201 social media and relevant websites. We will also use convenience sampling by having  
202 the health care providers in hospitals and organizations provide enrollment information  
203 and materials to potential participants.

204 Eligible participants will have a virtual visit through the University of Minnesota's  
205 secure Zoom conference ability with the study staff to review and address questions  
206 about the combined HIPAA/informed eConsent. The consent will be signed through a  
207 University of Minnesota Research Electronic Data Capture (REDCap) link. REDCap  
208 uses a MySQL database via a secure web interface with data checks to ensure data  
209 quality during data entry. All IRB rules and HIPAA rules protecting the participants'  
210 rights and confidentiality of records will be followed.

211 The study staff member will acquire demographic information and general health  
212 history and screen participants for cognitive ability with the Mini-Mental State  
213 Examination-short version.[27] and for kinesthetic imagery with the Kinesthetic and  
214 Visual Imagery questionnaire.[28] All data in this study will be entered into the REDCap  
215 database.

216

### 217 **Data collection and intervention procedures**

218 The scheduling of assessments and timeline of each study section is displayed in **Table**  
219 **1**.

220 **Table 1. Scheduling of enrolment, intervention, and assessments**

|                    | STUDY PERIOD                          |                               |                |                                                         |
|--------------------|---------------------------------------|-------------------------------|----------------|---------------------------------------------------------|
|                    | Enrolment +<br>BASELINE<br>assessment | Intervention +<br>Assessments |                | Follow-up<br>period (no<br>intervention) +<br>close-out |
| TIMEPOINT          | <i>Week 0</i>                         | <i>Week 6</i>                 | <i>Week 12</i> | <i>Week 18</i>                                          |
| ENROLMENT:         |                                       |                               |                |                                                         |
| Eligibility screen | X                                     |                               |                |                                                         |

|                                                                  |   |               |               |               |
|------------------------------------------------------------------|---|---------------|---------------|---------------|
| <b>eConsent</b>                                                  | X |               |               |               |
| <b>INTERVENTION:</b>                                             |   |               |               |               |
| <b><i>Qigong practice<br/>12 weeks, at least<br/>3x/week</i></b> |   | X             | X             |               |
| <b>ASSESSMENTS:</b>                                              |   |               |               |               |
| <b><i>Demographic and<br/>general health data</i></b>            | X |               |               |               |
| <b>Weekly primary<br/>outcome<br/>assessments</b>                | X | X<br>(weekly) | X<br>(weekly) | X<br>(weekly) |
| <b><i>Secondary outcome<br/>assessments</i></b>                  | X | X             | X             | X             |

221

222 **Qigong intervention**

223 A Qigong Master from the Spring Forest Qigong Center (Minnesota) will teach the  
224 introductory class of the “Five Element Qigong Healing Movements” (6h) over Zoom.

225 These movements can be done lying or sitting and/or through kinesthetic imagery, and  
226 thus, they are suitable for adults with SCI with paraplegia or tetraplegia.[17,23]

227 The participants will be instructed to actively move however much they comfortably  
228 can and perform kinesthetic imagery of the Qigong movements. The instructions of the  
229 kinesthetic imagery are to focus on imagining the feeling of performing the entire whole-  
230 body movement standing up while focusing on breathing and body awareness and to  
231 imagine the ‘feeling’ of the contact of the floor with the soles of their feet, rather than to  
232 ‘visualize’ the whole-body movement. If reproducing this feeling is difficult, participants  
233 will be asked to associate positive memories from before their SCI with this imagined

234 standing posture, e.g., the memory of feeling the warm sand under the soles of their  
235 feet on the beach or the feeling of grass under the soles of bare feet in the garden.

236 After the introductory class, participants will receive a password-protected website  
237 link to practice for 12 weeks. Because of the low-intensity Qigong movements or  
238 kinesthetic imagery, we anticipate that this trial will be safe and well-tolerated. Thus, we  
239 do not anticipate terminating the trial due to safety or tolerability issues.

240 **To address the feasibility outcome**, the Qigong website automatically monitors the  
241 days and duration that videos are accessed, which allows us to objectively track  
242 adherence. The Spring Forest Qigong center will provide the weekly logs to the principal  
243 investigator. Since participants will log in with their ID code given at the start of the  
244 study, no personal information is transmitted to the website or the center.

245 **Qigong Practice:** Qigong Master Chunyi Lin, MS in holistic healing, developed the  
246 video “Five Element Qigong Healing Movements”, and guides the participant on the  
247 online video through each of the five gentle horizontal and vertical arm and leg  
248 movements performed with guided breathing.[15,29] As defined by Traditional Chinese  
249 Medicine, each of the five movements connects to a specific natural element (Fire,  
250 Earth, Metal, Water, and Wood). Each element is associated with two meridians, with a  
251 specific organ system, and with specific emotions, which have a positive and negative  
252 counterpart. When practicing the Five Element Qigong Healing Movements, the focus is  
253 directed only on positive emotions. The explanation of the five movements (**Figure 2**) is  
254 detailed below.[29]

255        *Preparation phase:* The practice starts with smiling and focusing on the heart. The  
256 participants bounce for one minute with their arms relaxed next to the body, and another  
257 minute with their arms in the air. Master Lin then guides the participants through various  
258 cupping and tapping movements to open the energy channels related to each of the five  
259 organ systems. The preparation phase ends with setting an intention for healing. Then  
260 the five movements are performed for 5 minutes each.

261        *Movement 1: Moving of Yin and Yang.* This movement helps the liver system and is  
262 connected to the Wood element. The liver system is associated with the emotion of  
263 happiness (or its negative counterpart: anger). Movement 1 is performed by using the  
264 elbows to have the arms make an elliptical movement. The movement starts by moving  
265 the right hand out and down to the bottom of the torso, while the left hand moves in  
266 (closer to the body) and up to the face. While doing this movement, the focus is on the  
267 emotion of happiness and body sensations. After five minutes, the hands are brought  
268 down in front of the Lower Dantian, which is an energy center about the width of 3  
269 thumbs below the navel and 3 thumbs inward. The participants focus on the Lower  
270 Dantian and take a deep breath three times.

271        *Movement 2: Breathing of the Universe.* This movement helps the heart system and  
272 is connected to the Fire element. The heart system is associated with the emotion of joy  
273 (or its negative counterpart: hatred). After Movement 1, on the 4<sup>th</sup> breath, the  
274 participants inhale, bend their knees and open their hands to the sides. With the exhale,  
275 the hands come closer again and the participants straighten their body again.  
276 Participants focus on the emotion of joy and body sensations.

277        *Movement 3: Connecting with Heaven & Earth.* This movement helps the stomach  
278 and spleen systems and is connected to the Earth element. The stomach and spleen  
279 systems are associated with the emotion of peace and groundedness (or its negative  
280 counterpart: anxiety and thinking). Movement 3 activates the triple heater, which is an  
281 energy system that helps the internal organs, glands, and the lymph system. After  
282 Movement 2, the participants lower their hands to their sides and then move their hands  
283 up from both sides in the same way as they would hold a ball above their head. The  
284 hands are kept above the head during the entire duration of this movement. The  
285 participants inhale and bend their knees to lower the body slowly. As they exhale, they  
286 straighten their body. Participants focus on the emotion of peace and groundedness  
287 and body sensations.

288        *Movement 4: Connecting with Your Body's Energy.* This movement helps the lung  
289 system and is connected to the Metal element. The lung system is associated with the  
290 emotion of contentment (and its negative counterpart: depression and sadness).  
291 Movement 4 directs energy to a point called Hui Yin at the center of the pelvic floor, ½  
292 inch in front of the anus. This is where the female energy channels gather together.  
293 Performing this movement is beneficial for the reproductive organs in women and  
294 prostate function in men. The participants bring both hands down and connect the tips  
295 of their fingers forming a heart shape in front of their navel. The participants keep a light  
296 pressure on the tips of their fingers to stimulate the heart's energy. The participants  
297 bend the knees while keeping the spine and shoulders relaxed and straight and then  
298 spread the legs slightly by moving the right foot half a step out. While participants



299 inhale, they shift the body weight to the left, putting 70% of the weight on the left leg and  
300 holding this position for three seconds. As they exhale, they switch the body weight and  
301 put 70% of the weight on the right leg. They hold this position for three seconds. The  
302 participants keep shifting their body weight in this way from side to side. During this  
303 movement, participants focus on the emotion of contentment and their body sensations.

304 *Movement 5: Connecting with Your Heart's Energy.* This movement helps the kidney  
305 system and is connected to the Water element. The kidney system is associated with  
306 the emotion of gratitude and thankfulness (and its negative counterpart: fear).

307 Movement 5 helps to move energy to the Bai Hui point on the top of the head. The  
308 participants adjust their feet so they are standing with the feet shoulder-width apart.  
309 They put the hands together palm to palm in front of the chest while keeping a light  
310 pressure on the fingertips to stimulate the heart's energy. During the inhalation, the  
311 participants slowly bend forward at the waist. This is a small movement. With the  
312 exhale, the participants straighten back up. While doing this movement the participants  
313 focus on the emotion of gratitude and body sensations.

314 *The Ending: Harvesting of Qi.* The participants rub the hands together, palm to palm,  
315 and then massage the face and ears, comb through the hair, followed by cupping and  
316 tapping parts of the body. They then make gentle dolphin movements with the neck and  
317 body, and after more cupping, the practice ends by lifting and dropping the heels nine  
318 times.

319

320 **Outcome measures**

321 *Primary outcome measure: Intensity of neuropathic pain in the prior week*

322 Our primary behavioral outcome –the highest, average, and lowest neuropathic pain  
323 intensity ratings perceived in the prior week– will be recorded using the 0-10 Numerical  
324 Pain Rating Scale with 0 being no pain and 10 being the worst pain ever.[24] This scale  
325 has been recommended by the mission of the Initiative on Methods, Measurement, and  
326 Pain Assessment in Clinical Trials consensus group for use in pain clinical trials and by  
327 the 2006 National Institute on Disability and Rehabilitation Research SCI Pain outcome  
328 measures consensus group.[30,31]

329

330 *Secondary outcome measure*

331 *Location and impact of neuropathic pain; spasms frequency and severity:* Other pain  
332 data will be collected using the National Institute of Neurological Disorders-Common  
333 Data Elements International SCI Pain Basic Data Set Version 2.0.[32] This Data Set  
334 also assesses dimensions of pain (i.e., the intensity of pain, location, etc.), and how  
335 pain interferes with mood, activity, and sleep. The Brief Pain Inventory elicits self-report  
336 of pain intensity and its impact on functioning in the past 24h.[31] Spasms frequency  
337 and spasm severity will be evaluated with the Penn Spasm Frequency Scale.[33]

338 *Mood:* The Patient Health Questionnaire-9 assesses symptoms of depression.[34–  
339 38] The State-Trait Anxiety Inventory assesses current symptoms of anxiety (State  
340 anxiety) and a generalized propensity to be anxious (Trait anxiety).[39]

341 *Quality of life:* The World Health Organization Quality of Life Instruments  
342 (abbreviated version) assesses physical and psychological health, social relationships,

343 and environment.[40–42] The Satisfaction with Life Scale assesses a person’s  
344 happiness with the current quality of life.[43] The Moorong Self-Efficacy Scale assesses  
345 self-efficacy related to everyday life activities in adults with SCI.[44–46] The Pittsburgh  
346 Sleep Quality Index assesses sleep quality.[47]

347 *Body awareness:* The Revised Body Awareness Rating Questionnaire assesses  
348 how pain or tension in the body is affecting participants’ awareness and function in daily  
349 life (e.g., being comfortable when lying down).[48] The Postural Awareness Scale  
350 measures awareness of body posture in patients with chronic pain.[49] The Functional  
351 Appreciation Scale measures the level of appreciation one has for the functionality of  
352 the body.[50] The Multidimensional Assessment of Interoceptive Awareness measures  
353 interoceptive body awareness.[51] The Body perception questionnaire-short form  
354 measures interoceptive awareness and autonomic reactivity.[52,53] Participants self-  
355 report whether their cardiopulmonary system, bladder, bowel, and sexual function are  
356 normal or abnormal with the Autonomic Standards Assessment Form.[54]

357 *Function.* The Spinal Cord Injury Functional Index[55] measures functional  
358 performance across 5 domains: basic mobility, self-care, fine motor function, wheelchair  
359 mobility, and/or ambulation.[56] For the Patient Specific Functional Scale,[57] the  
360 participants will self-identify goals related to activities in daily life that are important to  
361 them. The participants will rate them at each time point between 0 (i.e., unable to do the  
362 activity without pain) and 10 (able to do the activity without pain).[57] For the Physical  
363 activity 3-day recall questionnaire, the participants describe all activities performed  
364 during the past 3 days.[58,59]

365 *Fear of injury due to movement:* The Tampa Scale for Kinesiophobia assesses fear  
366 of injury due to physical movement.[60]

367 *Community integration:* The Craig Handicap Assessment and Reporting Technique–  
368 Short Form is used to assess community integration.[61]

369

### 370 **Statistical analysis**

371 All analyses will be done using standard statistical software including SAS, Stata, and  
372 R. The data analysis from this feasibility study will provide an estimate of key trial  
373 elements to determine whether to proceed to a larger definitive RCT. Both Intent-to-  
374 Treat (ITT) and per-protocol (PP) analyses will be conducted, where ITT population is  
375 defined as all participants that are enrolled in the study, and PP population is defined as  
376 all participants who are enrolled and strictly adhere to the protocol. Descriptive statistics  
377 and percentages will be calculated for nominal and continuous demographic data and  
378 feasibility outcomes. The data will be transformed appropriately to ensure at least  
379 approximate normal distributions. Missing data will be handled using the multiple  
380 imputation and inverse probability weighting approaches.

381 For each of the primary and secondary endpoints, longitudinal models with mixed  
382 effects will be used to test the effect of Qigong practice on changes in pain and  
383 behavioral outcomes, which will include the subject-level effect, time, time-dependent  
384 treatment indicator as predictors as well as adjust for age, race, and other covariates as  
385 appropriate. Adults with SCI are heterogeneous in injury level, completeness, time since  
386 injury, age, and sex. The within-subject design is powerful as it eliminates variations due

387 to between-subject heterogeneity, though the success of Qigong may depend on injury  
388 levels and completeness. Thus, we will explore and describe these factors as potential  
389 confounders in the linear model.

390 The behavioral data will also be analyzed using a repeated measure ANOVA, with  
391 Tukey post hoc tests to evaluate changes between each time point, or the Friedman  
392 test with non-parametric post-hoc tests if the data are not normally distributed.

393

## 394 **DISCUSSION**

395 About 50% of Americans with SCI experience debilitating neuropathic pain, interfering  
396 with daily life.[3] Available treatments provide insufficient pain relief.[4] Prior research  
397 has proposed that the development and intensification of SCI-related neuropathic pain  
398 is dependent on brain reorganization associated with dysfunctional multisensory  
399 integration processes, as well as distorted body perception and representation.[10–13]  
400 Mind and body approaches, such as Qigong, train body awareness and reduce chronic  
401 pain, but evidence-based research on its use for SCI-related neuropathic pain is  
402 limited.[14–22]

403 Therefore, in this quasi-experimental study, we will test our hypothesis that Spring  
404 Forest Qigong's Five Element Qigong Healing Movements will reduce SCI-related  
405 neuropathic pain by improving body awareness. To our knowledge, this will be the first  
406 study using Qigong for neuropathic pain relief in adults with SCI. This study will provide  
407 preliminary evidence-based data on the feasibility of remotely delivered Qigong and  
408 whether Qigong practice reduces neuropathic pain and pain-related secondary

409 outcomes. The remote delivery of Qigong offers multiple applications for broad use in  
410 the home or community.

411 There are some limitations to this study. This quasi-experimental study will be  
412 conducted on a limited sample size and thus the results will need to be validated in a  
413 larger sample size and compared to a control group. The follow-up period is 6 weeks,  
414 which means that longer-term effects cannot be observed. Nevertheless, the data from  
415 the present work will inform the design of future randomized controlled trials with  
416 adequate sample size, intervention dosage, and follow-up duration.

417

## 418 **ETHICS AND DISSEMINATION**

419 We will adhere to the ethical guidelines of the Declaration of Helsinki. The University of  
420 Minnesota's Institutional Review Board (IRB) approved the study  
421 (IRB#STUDY00011997). The study is registered at ClinicalTrial.gov: NCT04917107.

422 The results will be presented at conferences and in peer-reviewed publications, in  
423 which we will acknowledge the stakeholders' contributions. Data will be stored in the  
424 Dryad repository of the University of Minnesota. We will use our existing community  
425 connections at the University of Minnesota to disseminate information, spread  
426 awareness of Qigong and the results, and hold dialogues with stakeholders. This study  
427 will help us design future larger studies, strengthen our funding proposals, and provide  
428 us with a platform to educate consumers, caregivers, and providers locally and  
429 nationally.

430

431 **AUTHOR CONTRIBUTIONS**

432 AVDW, LM, and RB were responsible for the conception and design of the work in  
433 collaboration with adults with SCI-related neuropathic pain. AVDW is the principal  
434 investigator of the study, oversees, and manages the study. AVDW also communicates  
435 with the University of Minnesota's Clinical and Translational Science Institute (CTSI)'s  
436 monitor every 6 months and submits protocol modifications to relevant parties. LM is  
437 overseeing participant recruitment. LZ is responsible for the statistical analysis. AVDW,  
438 SC, and WD will collect the data.

439 AVDW wrote the original draft. All authors contributed substantially to parts of the  
440 manuscript, critically revised it for content, approved the final version, and agreed to be  
441 accountable for the accuracy and integrity of this work.

442

443 **ACKNOWLEDGMENTS**

444 We thank Master Chunyi Lin, MS, and Master Jaci Gran from the Spring Forest Qigong  
445 for their consultancy and assistance with providing the content of the 5 Element Qigong  
446 Healing Movements protocol. We thank the adults with SCI and neuropathic pain who  
447 gave their valuable input on the research questions, intervention, assessments, and  
448 elements of the study design. We present our profound thanks to Marc Noël for the  
449 critical review of the manuscript.

450

451 **COMPETING INTEREST STATEMENT**

452 The authors have no conflict of interest to declare.

453

454 **FUNDING STATEMENT**

455 This study is internally funded by the Division of Physical Therapy, Department of  
456 Rehabilitation Medicine, Medical School, University of Minnesota. The research is  
457 supported by the National Institutes of Health's National Center for Advancing  
458 Translational Sciences, grant UL1TR002494. The content is solely the responsibility of  
459 the authors and does not necessarily represent the official views of the National  
460 Institutes of Health's National Center for Advancing Translational Sciences. The funders  
461 have no role in study design, data collection, and analysis, decision to publish, or  
462 preparation of the manuscript.



463 **FIGURE LEGENDS**

464 **Figure 1.** Study flow chart

465 **Figure 2.** Depiction of the Five Element Qigong Healing Movements from Spring Forest

466 Qigong.

467 *Legend:* The five movements are presented from left to right. Movement 1: Moving of

468 Yin and Yang; Movement 2: Breathing of the Universe; Movement 3: Connecting with

469 Heaven & Earth; Movement 4: Connecting with Your Body's Energy; Movement 5:

470 Connecting with Your Heart's Energy. Details of how the different movements are

471 performed are presented in the text.

472

473 **REFERENCES**

- 474 1 Burke D, Fullen BM, Stokes D, *et al.* Neuropathic pain prevalence following spinal  
475 cord injury: A systematic review and meta-analysis. *Eur J Pain* 2017;**21**:29–44.
- 476 2 Gibbs K, Beaufort A, Stein A, *et al.* Assessment of pain symptoms and quality of life  
477 using the International Spinal Cord Injury Data Sets in persons with chronic spinal  
478 cord injury. *Spinal Cord Ser Cases* 2019;**5**:32.
- 479 3 Spotlight: Improving Care for Veterans with Spinal Cord Injuries and Disorders.  
480 2006.<https://www.hsrd.research.va.gov/news/feature/sci.cfm?ID=1160> (accessed 6  
481 Aug 2020).
- 482 4 Hatch MN, Cushing TR, Carlson GD, *et al.* Neuropathic pain and SCI: Identification  
483 and treatment strategies in the 21st century. *J Neurol Sci* 2018;**384**:75–83.
- 484 5 Solstrand Dahlberg L, Becerra L, Borsook D, *et al.* Brain changes after spinal cord  
485 injury, a quantitative meta-analysis and review. *Neurosci Biobehav Rev*  
486 2018;**90**:272–93.
- 487 6 Nees TA, Finnerup NB, Blesch A, *et al.* Neuropathic pain after spinal cord injury:  
488 the impact of sensorimotor activity. *Pain* 2017;**158**:371–6.
- 489 7 Siddall PJ, Middleton JW. Spinal cord injury-induced pain: mechanisms and  
490 treatments. *Pain Manag* 2015;**5**:493–507.
- 491 8 Kaushal M, Oni-Orisan A, Chen G, *et al.* Evaluation of Whole-Brain Resting-State  
492 Functional Connectivity in Spinal Cord Injury: A Large-Scale Network Analysis  
493 Using Network-Based Statistic. *J Neurotrauma* 2017;**34**:1278–82.
- 494 9 Wang W, Xie W, Zhang Q, *et al.* Reorganization of the brain in spinal cord injury: a

- 495 meta-analysis of functional MRI studies. *Neuroradiology* Published Online First: 16  
496 August 2019. doi:10.1007/s00234-019-02272-3
- 497 10 Leemhuis E, De Gennaro L, Pazzaglia AM. Disconnected Body Representation:  
498 Neuroplasticity Following Spinal Cord Injury. *J Clin Med Res* 2019;**8**.  
499 doi:10.3390/jcm8122144
- 500 11 Lenggenhager B, Pazzaglia M, Scivoletto G, *et al*. The sense of the body in  
501 individuals with spinal cord injury. *PLoS One* 2012;**7**:e50757.
- 502 12 Pozeg P, Palluel E, Ronchi R, *et al*. Virtual reality improves embodiment and  
503 neuropathic pain caused by spinal cord injury. *Neurology* 2017;**89**:1894–903.
- 504 13 Vastano R, Costantini M, Widerstrom-Noga E. Maladaptive reorganization following  
505 SCI: The role of body representation and multisensory integration. *Prog Neurobiol*  
506 2022;**208**:102179.
- 507 14 Mehling WE, Wrubel J, Daubenmier JJ, *et al*. Body Awareness: a  
508 phenomenological inquiry into the common ground of mind-body therapies. *Philos*  
509 *Ethics Humanit Med* 2011;**6**:6.
- 510 15 Coleman JF. Spring Forest Qigong and chronic pain: making a difference. *J Holist*  
511 *Nurs* 2011;**29**:118–28; quiz 129–31.
- 512 16 Lynch M, Sawynok J, Hiew C, *et al*. A randomized controlled trial of qigong for  
513 fibromyalgia. *Arthritis Res Ther* 2012;**14**:R178.
- 514 17 Klein P, Picard G, Baumgarden J, *et al*. Meditative Movement, Energetic, and  
515 Physical Analyses of Three Qigong Exercises: Unification of Eastern and Western  
516 Mechanistic Exercise Theory. *Medicines (Basel)* 2017;**4**.

- 517           doi:10.3390/medicines4040069
- 518   18 Taylor SM, Cheung EO, Sun R, *et al.* Applications of complementary therapies  
519           during rehabilitation for individuals with traumatic Spinal Cord Injury: Findings from  
520           the SCIRehab Project. *J Spinal Cord Med* 2019;**42**:571–8.
- 521   19 Zou L, Zhang Y, Yang L, *et al.* Are Mindful Exercises Safe and Beneficial for  
522           Treating Chronic Lower Back Pain? A Systematic Review and Meta-Analysis of  
523           Randomized Controlled Trials. *J Clin Med Res* 2019;**8**. doi:10.3390/jcm8050628
- 524   20 Phattharasupharerk S, Purepong N, Eksakulkla S, *et al.* Effects of Qigong practice  
525           in office workers with chronic non-specific low back pain: A randomized control trial.  
526           *J Bodyw Mov Ther* 2019;**23**:375–81.
- 527   21 Curtis K, Hitzig SL, Bechsgaard G, *et al.* Evaluation of a specialized yoga program  
528           for persons with a spinal cord injury: a pilot randomized controlled trial. *J Pain Res*  
529           2017;**10**:999–1017.
- 530   22 Shem K, Karasik D, Carufel P, *et al.* Seated Tai Chi to alleviate pain and improve  
531           quality of life in individuals with spinal cord disorder. *J Spinal Cord Med*  
532           2016;**39**:353–8.
- 533   23 Kuan S-C, Chen K-M, Wang C. Effectiveness of Qigong in Promoting the Health of  
534           Wheelchair-Bound Older Adults in Long-Term Care Facilities. *Biological Research*  
535           For Nursing. 2012;**14**:139–46. doi:10.1177/1099800411399645
- 536   24 Hanley MA, Jensen MP, Ehde DM, *et al.* Clinically significant change in pain  
537           intensity ratings in persons with spinal cord injury or amputation. *Clin J Pain*  
538           2006;**22**:25–31.

- 539 25 Home Page - NSCISC Application. <https://www.nscisc.uab.edu/> (accessed 6 Aug  
540 2020).
- 541 26 Data by Topic: Age, Race & Ethnicity. [https://mn.gov/admin/demography/data-by-](https://mn.gov/admin/demography/data-by-topic/age-race-ethnicity/)  
542 [topic/age-race-ethnicity/](https://mn.gov/admin/demography/data-by-topic/age-race-ethnicity/) (accessed 6 Aug 2020).
- 543 27 Folstein MF, Folstein SE, McHugh PR. 'Mini-mental state': a practical method for  
544 grading the cognitive state of patients for the clinician. *J Psychiatr Res*  
545 1975;**12**:189–98.
- 546 28 Malouin F, Richards CL, Jackson PL, *et al.* The Kinesthetic and Visual Imagery  
547 Questionnaire (KVIQ) for assessing motor imagery in persons with physical  
548 disabilities: a reliability and construct validity study. *J Neurol Phys Ther*  
549 2007;**31**:20–9.
- 550 29 User S. Courses - Five Element Healing Movements.  
551 [https://www.springforestqigong.com/shop/healing-tools-courses/five-element-](https://www.springforestqigong.com/shop/healing-tools-courses/five-element-healing-movements-store)  
552 [healing-movements-store](https://www.springforestqigong.com/shop/healing-tools-courses/five-element-healing-movements-store) (accessed 10 Feb 2022).
- 553 30 Dworkin RH, Turk DC, Farrar JT, *et al.* Core outcome measures for chronic pain  
554 clinical trials: IMMPACT recommendations. *Pain* 2005;**113**:9–19.
- 555 31 Bryce TN, Budh CN, Cardenas DD, *et al.* Pain after spinal cord injury: an evidence-  
556 based review for clinical practice and research. Report of the National Institute on  
557 Disability and Rehabilitation Research Spinal Cord Injury Measures meeting. *J*  
558 *Spinal Cord Med* 2007;**30**:421–40.
- 559 32 Widerström-Noga E, Biering-Sørensen F, Bryce TN, *et al.* The International Spinal  
560 Cord Injury Pain Basic Data Set (version 2.0). *Spinal Cord* 2014;**52**:282–6.

- 561 33 Mills PB, Vakil AP, Phillips C, *et al.* Intra-rater and inter-rater reliability of the Penn  
562 Spasm Frequency Scale in People with chronic traumatic spinal cord injury. *Spinal*  
563 *Cord* 2018;**56**:569–74.
- 564 34 Fann JR, Bombardier CH, Richards JS, *et al.* Depression after spinal cord injury:  
565 comorbidities, mental health service use, and adequacy of treatment. *Arch Phys*  
566 *Med Rehabil* 2011;**92**:352–60.
- 567 35 Krause JS, Reed KS, McArdle JJ. Factor Structure and Predictive Validity of  
568 Somatic and Nonsomatic Symptoms From the Patient Health Questionnaire-9: A  
569 Longitudinal Study After Spinal Cord Injury. *Archives of Physical Medicine and*  
570 *Rehabilitation*. 2010;**91**:1218–24. doi:10.1016/j.apmr.2010.04.015
- 571 36 Bombardier CH, Richards JS, Krause JS, *et al.* Symptoms of major depression in  
572 people with spinal cord injury: implications for screening. *Arch Phys Med Rehabil*  
573 2004;**85**:1749–56.
- 574 37 Krause JS, Saunders LL, Reed KS, *et al.* Comparison of the Patient Health  
575 Questionnaire and the Older Adult Health and Mood Questionnaire for self-reported  
576 depressive symptoms after spinal cord injury. *Rehabil Psychol* 2009;**54**:440–8.
- 577 38 Kroenke K, Spitzer RL, Williams JB. The PHQ-9: validity of a brief depression  
578 severity measure. *J Gen Intern Med* 2001;**16**:606–13.
- 579 39 Julian LJ. Measures of anxiety: State-Trait Anxiety Inventory (STAI), Beck Anxiety  
580 Inventory (BAI), and Hospital Anxiety and Depression Scale-Anxiety (HADS-A).  
581 *Arthritis Care & Research*. 2011;**63**:S467–72. doi:10.1002/acr.20561
- 582 40 Jang Y, Hsieh C-L, Wang Y-H, *et al.* A validity study of the WHOQOL-BREF

- 583 assessment in persons with traumatic spinal cord injury. *Arch Phys Med Rehabil*  
584 2004;**85**:1890–5.
- 585 41 Hill MR, Noonan VK, Sakakibara BM, *et al.* Quality of life instruments and  
586 definitions in individuals with spinal cord injury: a systematic review. *Spinal Cord*  
587 2010;**48**:438–50.
- 588 42 Lin M-R, Hwang H-F, Chen C-Y, *et al.* Comparisons of the Brief Form of the World  
589 Health Organization Quality of Life and Short Form-36 for Persons With Spinal  
590 Cord Injuries. *American Journal of Physical Medicine & Rehabilitation*.  
591 2007;**86**:104–13. doi:10.1097/01.phm.0000247780.64373.0e
- 592 43 Diener E, Emmons RA, Larsen RJ, *et al.* The Satisfaction With Life Scale. *Journal*  
593 *of Personality Assessment*. 1985;**49**:71–5. doi:10.1207/s15327752jpa4901\_13
- 594 44 Middleton JW, Tran Y, Lo C, *et al.* Reexamining the Validity and Dimensionality of  
595 the Moorong Self-Efficacy Scale: Improving Its Clinical Utility. *Arch Phys Med*  
596 *Rehabil* 2016;**97**:2130–6.
- 597 45 Middleton JW, Tate RL, Geraghty TJ. Self-Efficacy and Spinal Cord Injury:  
598 Psychometric Properties of a New Scale. *Rehabil Psychol* 2003;**48**:281–8.
- 599 46 Miller SM. The measurement of self-efficacy in persons with spinal cord injury:  
600 psychometric validation of the moorong self-efficacy scale. *Disabil Rehabil*  
601 2009;**31**:988–93.
- 602 47 Buysse DJ, Reynolds CF 3rd, Monk TH, *et al.* The Pittsburgh Sleep Quality Index:  
603 a new instrument for psychiatric practice and research. *Psychiatry Res*  
604 1989;**28**:193–213.

- 605 48 Dragesund T, Strand LI, Grotle M. The Revised Body Awareness Rating  
606 Questionnaire: Development Into a Unidimensional Scale Using Rasch Analysis.  
607 *Phys Ther* 2018;**98**:122–32.
- 608 49 Cramer H, Mehling WE, Saha FJ, *et al.* Postural awareness and its relation to pain:  
609 validation of an innovative instrument measuring awareness of body posture in  
610 patients with chronic pain. *BMC Musculoskelet Disord* 2018;**19**:109.
- 611 50 Alleva JM, Tylka TL, Kroon Van Diest AM. The Functionality Appreciation Scale  
612 (FAS): Development and psychometric evaluation in U.S. community women and  
613 men. *Body Image* 2017;**23**:28–44.
- 614 51 Mehling WE, Price C, Daubenmier JJ, *et al.* The Multidimensional Assessment of  
615 Interoceptive Awareness (MAIA). *PLoS One* 2012;**7**:e48230.
- 616 52 Porges S. Body perception questionnaire: Laboratory of Developmental  
617 Assessment University of Maryland. *Pridobljeno* 1993;**15**:2009.
- 618 53 Cabrera A, Kolacz J, Pailhez G, *et al.* Assessing body awareness and autonomic  
619 reactivity: Factor structure and psychometric properties of the Body Perception  
620 Questionnaire-Short Form (BPQ-SF). *Int J Methods Psychiatr Res* Published  
621 Online First: 2017. doi:10.1002/mpr.1596
- 622 54 Krassioukov A, Biering-Sørensen F, Donovan W, *et al.* International standards to  
623 document remaining autonomic function after spinal cord injury. *J Spinal Cord Med*  
624 2012;**35**:201–10.
- 625 55 Slavin MD, Ni P, Tulskey DS, *et al.* Spinal Cord Injury–Functional Index/Assistive  
626 Technology Short Forms. *Arch Phys Med Rehabil* 2016;**97**:1745–52.e7.



- 627 56 Keeney T, Slavin M, Kisala P, *et al.* Sensitivity of the SCI-FI/AT in Individuals With  
628 Traumatic Spinal Cord Injury. *Arch Phys Med Rehabil* 2018;**99**:1783–8.
- 629 57 Westaway MD, Stratford PW, Binkley JM. The patient-specific functional scale:  
630 validation of its use in persons with neck dysfunction. *J Orthop Sports Phys Ther*  
631 1998;**27**:331–8.
- 632 58 Jörgensen S, Martin Ginis KA, Lexell J. Leisure time physical activity among older  
633 adults with long-term spinal cord injury. *Spinal Cord* 2017;**55**:848–56.
- 634 59 Martin Ginis KA, Phang SH, Latimer AE, *et al.* Reliability and Validity Tests of the  
635 Leisure Time Physical Activity Questionnaire for People With Spinal Cord Injury.  
636 *Arch Phys Med Rehabil* 2012;**93**:677–82.
- 637 60 Kori SH, Miller RP, Todd DD. Kinesiophobia: A new view of chronic pain behavior.  
638 *Pain Management* 1990;:35–43.
- 639 61 Whiteneck GG, Charlifue SW, Gerhart KA, *et al.* Quantifying handicap: a new  
640 measure of long-term rehabilitation outcomes. *Arch Phys Med Rehabil*  
641 1992;**73**:519–26.
- 642

# Study Design

**1. Screen and consent adults with SCI-related neuropathic pain and with paraplegia or tetraplegia**

**Excluded** (state reason)

**2. Baseline behavioral assessments over Zoom**

**3. Qigong practice**  
12 weeks, 3x/week,  
41min/session with online  
video + weekly follow-up on  
neuropathic pain intensity

**Withdrawal/drop-out/adverse  
event** (state reason)

**4. Mid-practice behavioral assessments over Zoom  
(6 weeks of Qigong practice)**

**5. End of practice behavioral assessments over Zoom  
(12 weeks of Qigong practice)**

**6. 6-weeks Follow-up**  
No Qigong practice +  
weekly follow-up on  
neuropathic pain intensity

**7. End of study behavioral assessments over Zoom**

**8. Statistical analysis**

# 5 Elements

QIGONG FOR SELF HEALING

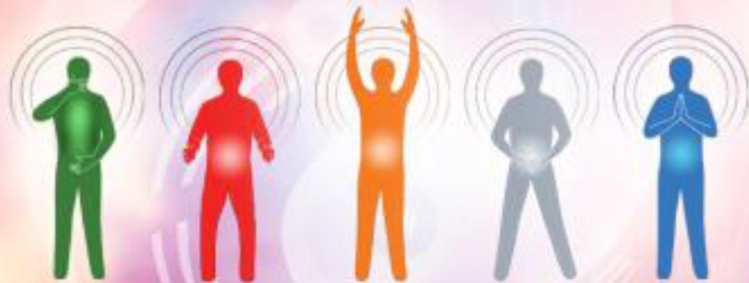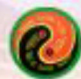

SPRING FOREST  
QIGONG
